# Supplementary material
Source: HighWire-hosted journal article supplement (https://jech.bmj.com/content/71/5/439)

**Figure S1. Categories of employment histories in women**

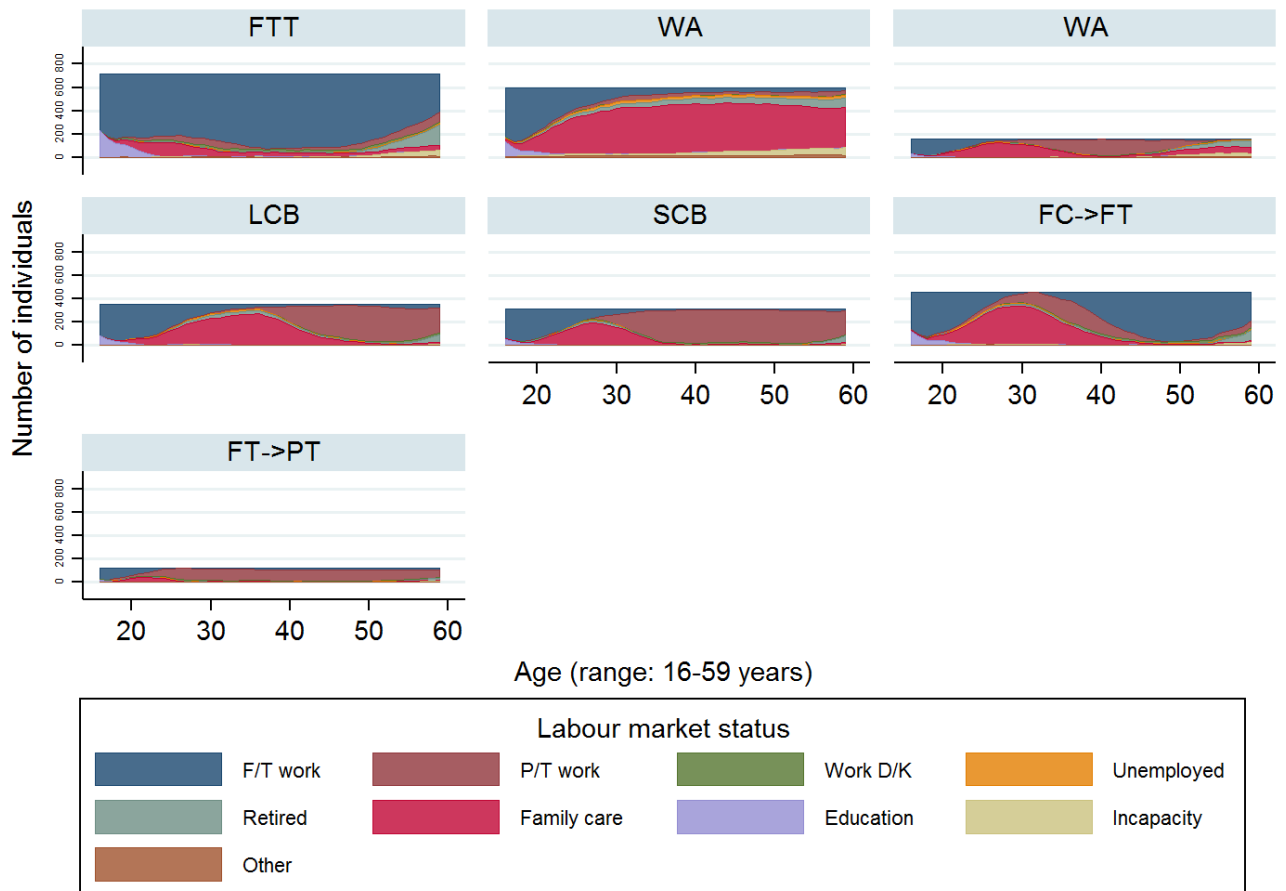

**Figure S2. Categories of employment histories in men**

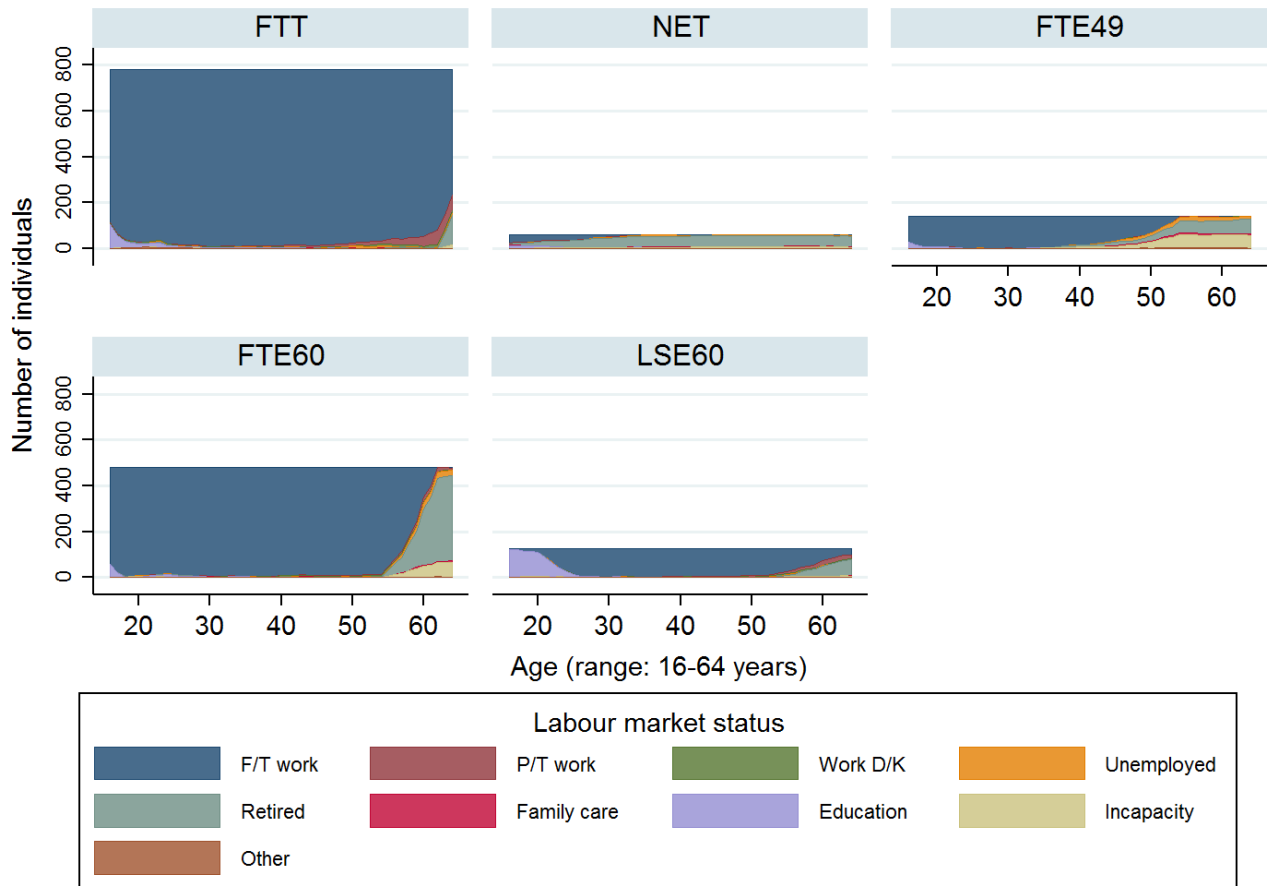

Supplement: inline-supplementary-material-2 [file inline-supplementary-material-2.pdf]
